# Supplementary material
Source: PubMed Central journal article supplement (PMC8640550)
Supplement: mmc1.pdf [file mmc1.pdf]

**Supplemental Materials for “NAD+ biosynthetic impairment and urinary metabolomic alterations observed in hospitalized adults with COVID-19-related acute kidney injury.”**

| <b>Section</b>                                                                                                                                                                | <b>Page</b> |
|-------------------------------------------------------------------------------------------------------------------------------------------------------------------------------|-------------|
| Supplement 1: Supplemental methods                                                                                                                                            | 2           |
| Supplement 2: Supplemental acknowledgments                                                                                                                                    | 5           |
| Supplement 3: Supplemental Table S1. List of metabolites identified in patient urine using liquid chromatography - tandem mass spectrometry                                   | 7           |
| Supplement 4: Supplemental Table S2. Differences in metabolites related to NAD+ synthesis between groups of hospitalized COVID-19 patients with and without AKI               | 11          |
| Supplement 5: Supplemental Figure S1. Important features identified by variable importance in projection scores in supervised partial least squares analysis                  | 12          |
| Supplement 6: Supplemental Figure S2. Urine metabolomic features distinguishing acute kidney injury (AKI) among COVID-19 patients pooled across Boston and Birmingham cohorts | 13          |
| Supplement 7: Modified STROBE Statement                                                                                                                                       | 15          |

## Supplement 1: Supplemental Methods

### *Urine Collection and Processing:*

Urine specimens were collected a median of 6.5 days after the first positive SARS-CoV-2 test in the non-AKI group (12 d among Boston patients, 1 d among Birmingham patients) and 4 days after the first positive test in the AKI group (10 d among Boston patients, 2 d among Birmingham patients). Urine was collected either as a voided specimen or from a urinary catheter.

Specimens were subsequently transferred to a biosafety level (BSL) 2+ Laboratory. Samples in Birmingham were centrifuged immediately following collections, with cell-free supernatant collected. 0.35 ml of supernatant from each sample was mixed with 1.4 ml of ice-cold methanol and then stored at -80°C. Samples in Boston were stored at -80°C prior to centrifugation, and subsequently defrosted on ice. Defrosted specimens were centrifuged and cell-free supernatant was mixed with methanol at the same ratio of 1 part supernatant to 4 parts methanol, then re-frozen at -80°C and shipped on dry ice to UAB for analysis. Samples containing 80% aqueous methanol without urine were prepared to serve as a blank at each site.

### *Metabolomic Studies:*

Samples containing urine supernatant with methanol were brought to 4°C and then centrifuged at 10,000 x g for 10 min. Each resulting supernatant was transferred to a new tube and evaporated to dryness under N<sub>2</sub>. Dry residues were redissolved in double-distilled water (100 µL). Equal volumes of each sample were combined to make a pooled sample. Aliquots (20 µL) of each sample and the pooled sample (the latter three times) were individually injected onto a 10 cm x 2.1 mm ID LunaOmega column (Phenomenex, CA) equilibrated with 0.1% formic acid at flow rate of at 0.5 ml/min. Bound metabolites were eluted using a 6 min linear gradient (2-98%) of acetonitrile in 0.1% formic acid – from 6-7 min the mobile phase was 99.9% acetonitrile/0.1% formic acid; from 7-10 min the column was re-equilibrated with 0.1% formic acid at a flow rate of 0.5 ml/min. Eluates were passed into an electrospray ionization interface of a SCIEX (San Jose, CA) TripleTOF 5600plus mass spectrometer operating at -3500 V (negative ion spectra) or 4500 V (positive ion spectra). Full scan, high resolution/high mass accurate TOF MS spectra were collected for all samples every 250 ms. The peak widths were 2.5-3 s, meaning that each peak was mapped with 10-12 data points to accurately estimate the area under each peak. A pooled sample was separately used to collect MSMS spectra using the following 0.5 s duty cycle: 100ms full scan, high resolution/high mass accurate TOF MS spectrum, followed by up to eight 50 ms high resolution/high mass accurate TOF product ion

MSMS spectra from precursor ions selected using the quadrupole filter. This was repeated three times. The order of sample analysis was randomized in each batch with the proviso that the repeats of the pooled sample for the batch were distributed evenly across the analysis. The data were recorded as .wiff and .wiffscan files.

#### *Data analysis*

LC-MSMS spectral data .wiff and .wiffscan files were analyzed using MS-DIAL, version 4.48 (<http://prime.psc.riken.jp/compms/msdial/main.html>) with version 15 of the public database of MSMS files (290,915 positive ion MSMS spectra representing 13,303 compounds and 36,848 negative ion MSMS spectra representing 12,879 compounds). Mass accuracies for MS and MSMS spectra were set at 10 ppm and 15 ppm, respectively, and variance of the retention time at 0.10 min. The matched MSMS features were filtered to remove those that exhibited a coefficient of variation in the replicate pooled samples that exceeded 10%. Using a minimum ratio of 10:1 between the areas of the matched metabolites and the 80% aqueous methanol blank, other compounds were removed from the dataset. Those whose pooled values were greater than 25% of the means of the AKI or non-AKI samples were also removed. Some were from both positive and negative libraries as they formed [M+H]<sup>+</sup> and [M-H]<sup>-</sup> molecular ions. All metabolite peak AUC values included in analyses were determined by MSMS except 3-hydroxyanthranilate and nicotinamide mononucleotide, which were determined by MS with retention time.

Validation of the metabolic intermediates present in the urines was carried out using the Mass Spectrometry Metabolite Library of Standards (IROA Technologies, Sea Girt, NJ). Where possible, authentic specimens of drugs and their metabolites were obtained in order to validate their presence in the urines.

The drugs used in the treatment of these two groups of patients that were detected by LC-MS were: acetaminophen, amitriptyline, amlodipine, atenolol, bumetanide, buspirone, citalopram, clindamycin, codeine, cortisone, descladinose-azithromycin, dextromethorphan, diphenhydramine, fluconazole, gabapentin, hydrocodone, iohexol, iopamidol, ketamine, lidocaine, metformin, metoclopramide, metoprolol, ondansetron, piperacillin, sertraline, and trimethoprim. These were excluded from subsequent analyses comparing metabolites between populations.

Peak AUC values for each metabolite were corrected for urine creatinine prior to analysis by dividing each peak AUC value by the corresponding urinary creatinine peak AUC value for each participant. Peak AUC values were log-transformed, mean centered, and divided by respective standard deviations as part of processing for analysis done in Metaboanalyst.

## **Supplement 2: Supplemental acknowledgments**

### MGH COVID-19 Collection & Processing Team Participants

*Collection Team:* Kendall Lavin-Parsons<sup>1</sup>, Blair Parry<sup>1</sup>, Brendan Lilley<sup>1</sup>, Carl Lodenstein<sup>1</sup>, Brenna McKaig<sup>1</sup>, Nicole Charland<sup>1</sup>, Hargun Khanna<sup>1</sup>, Justin Margolin<sup>1</sup>, Edward DeMers<sup>6</sup>, Kelly Judge<sup>6</sup>, Bruce D. Walker<sup>6</sup>, Peggy Lai<sup>6</sup>, Musie S. Ghebremichael<sup>6</sup>

*Processing Team:* Anna Gonye<sup>2</sup>, Irena Gushterova<sup>2</sup>, Tom Lasalle<sup>2</sup>, Nihaarika Sharma<sup>2</sup>, Brian C. Russo<sup>3</sup>, Maricarmen Rojas-Lopez<sup>3</sup>, Moshe Sade-Feldman<sup>4</sup>, Kasidet Manakongtreecheep<sup>4</sup>, Jessica Tantivit<sup>4</sup>, Molly Fisher Thomas<sup>4</sup>

### Massachusetts Consortium on Pathogen Readiness:

Betelihem A. Abayneh<sup>5</sup>, Patrick Allen<sup>5</sup>, Diane Antille<sup>5</sup>, Katrina Armstrong<sup>5</sup>, Siobhan Boyce<sup>5</sup>, Joan Braley<sup>5</sup>, Karen Branch<sup>5</sup>, Katherine Broderick<sup>5</sup>, Julia Carney<sup>5</sup>, Andrew Chan<sup>5</sup>, Susan Davidson<sup>5</sup>, Michael Dougan<sup>5</sup>, David Drew<sup>5</sup>, Ashley Elliman<sup>5</sup>, Keith Flaherty<sup>5</sup>, Jeanne Flannery<sup>5</sup>, Pamela Forde<sup>5</sup>, Elise Gettings<sup>5</sup>, Amanda Griffin<sup>5</sup>, Sheila Grimmel<sup>5</sup>, Kathleen Grinke<sup>5</sup>, Kathryn Hall<sup>5</sup>, Meg Healy<sup>5</sup>, Deborah Henault<sup>5</sup>, Grace Holland<sup>5</sup>, Chantal Kayitesi<sup>5</sup>, Vlasta LaValle<sup>5</sup>, Yuting Lu<sup>5</sup>, Sarah Luthern<sup>5</sup>, Jordan Marchewka (Schneider)<sup>5</sup>, Brittani Martino<sup>5</sup>, Roseann McNamara<sup>5</sup>, Christian Nambu<sup>5</sup>, Susan Nelson<sup>5</sup>, Marjorie Noone<sup>5</sup>, Christine Ommerborn<sup>5</sup>, Lois Chris Pacheco<sup>5</sup>, Nicole Phan<sup>5</sup>, Falisha A. Porto<sup>5</sup>, Edward Ryan<sup>5</sup>, Kathleen Selleck<sup>5</sup>, Sue Slaughenhaupt<sup>5</sup>, Kimberly Smith Sheppard<sup>5</sup>, Elizabeth Suschana<sup>5</sup>, Vivine Wilson<sup>5</sup>, Galit Alter<sup>6</sup>, Alejandro Balazs<sup>6</sup>, Julia Bals<sup>6</sup>, Max Barbash<sup>6</sup>, Yannic Bartsch<sup>6</sup>, Julie Boucau<sup>6</sup>, Josh Chevalier<sup>6</sup>, Fatema Chowdhury<sup>6</sup>, Kevin Einkauf<sup>6</sup>, Jon Fallon<sup>6</sup>, Liz Fedirko<sup>6</sup>, Kelsey Finn<sup>6</sup>, Pilar Garcia-Broncano<sup>6</sup>, Ciputra Hartana<sup>6</sup>, Chenyang Jiang<sup>6</sup>, Paulina Kaplonek<sup>6</sup>, Marshall Karpell<sup>6</sup>, Evan C. Lam<sup>6</sup>, Kristina Lefteri<sup>6</sup>, Xiaodong Lian<sup>6</sup>, Mathias Lichterfeld<sup>6</sup>, Daniel Lingwood<sup>6</sup>, Hang Liu<sup>6</sup>, Jinqing Liu<sup>6</sup>, Natasha Ly<sup>6</sup>, Ashlin Michell<sup>6</sup>, Ilan Millstrom<sup>6</sup>, Noah Miranda<sup>6</sup>, Claire O'Callaghan<sup>6</sup>, Matthew Osborn<sup>6</sup>, Shiv Pillai<sup>6</sup>, Yelizaveta Rassadkina<sup>6</sup>, Alexandra Reissis<sup>6</sup>, Francis Ruzicka<sup>6</sup>, Kyra Seiger<sup>6</sup>, Libera Sessa<sup>6</sup>, Christianne Sharr<sup>6</sup>, Sally Shin<sup>6</sup>, Nishant Singh<sup>6</sup>, Weiwei Sun<sup>6</sup>, Xiaoming Sun<sup>6</sup>, Hannah Ticheli<sup>6</sup>, Alicja Trocha-Piechocka<sup>6</sup>, Daniel Worrall<sup>6</sup>, Alex Zhu<sup>6</sup>, George Daley<sup>7</sup>, David Golan<sup>7</sup>, Howard Heller<sup>7</sup>, Arlene Sharpe<sup>7</sup>, Nikolaus sJilg<sup>8</sup>, Alex Rosenthal<sup>8</sup>, Colline Wong<sup>8</sup>

### UAB COVID-19 Collection & Processing Team Participants

Tyler Plumlee<sup>9</sup>, Wanda Hall<sup>9</sup>, Jing Wu<sup>9</sup>, Rachael Shevin<sup>9</sup>, Lianhua Jin<sup>9</sup>, Youling Yuan<sup>9</sup>, Shahela Laboni<sup>9</sup>, Marilyn Eady<sup>9</sup>, and Daniella Lawhon<sup>9</sup>

<sup>1</sup>Department of Emergency Medicine, Massachusetts General Hospital, Boston, MA, USA.

<sup>2</sup>Massachusetts General Hospital Cancer Center, Boston, MA, USA.

<sup>3</sup>Division of Infectious Diseases, Department of Medicine, Massachusetts General Hospital, Boston, MA, USA.

<sup>4</sup>Massachusetts General Hospital Center for Immunology and Inflammatory Diseases, Boston, MA, USA.

<sup>5</sup>Massachusetts General Hospital, Boston, MA, USA.

<sup>6</sup>Ragon Institute of MGH, MIT and Harvard, Cambridge, MA, USA.

<sup>7</sup>Harvard Medical School, Boston, MA, USA.

<sup>8</sup>Brigham and Women's Hospital, Boston, MA, USA.

<sup>9</sup>Center for Clinical and Translational Science, University of Alabama at Birmingham, Birmingham, AL, USA

**Supplement 3:**

**Supplemental Table S1. List of metabolites identified in patient urine using liquid chromatography - tandem mass spectrometry.**

| Boston +             | Boston -               | Alabama +                         | Alabama -              |
|----------------------|------------------------|-----------------------------------|------------------------|
| 1-METHYL-L-HISTIDINE |                        | 1-METHYL-L-HISTIDINE              |                        |
| 1-METHYLNICOTINAMIDE |                        | 1-METHYLNICOTINAMIDE              |                        |
|                      |                        |                                   | 2-OH-BUTYRATE          |
| 2,5-DIMETHYLPYRAZINE |                        |                                   |                        |
|                      |                        | 3-(2-HYDROXYPHENYL)<br>PROPANOATE |                        |
|                      |                        | 3-HYDROXYANTHRANILATE             |                        |
| 4-ACETAMIDOBUTANOATE |                        | 4-ACETAMIDOBUTANOATE              |                        |
|                      |                        |                                   | 4-OH-BENZOATE          |
| 4-PYRIDOXATE         | 4-PYRIDOXATE           | 4-PYRIDOXATE                      | 4-PYRIDOXATE           |
|                      |                        | 5-METHYLCYTOSINE                  |                        |
|                      | 6-CARBOXY<br>HEXANOATE |                                   | 6-CARBOXY<br>HEXANOATE |
| ADENOSINE            |                        | ADENOSINE                         |                        |
|                      | ASCORBATE              |                                   | ASCORBATE              |
| BETAINE              |                        | BETAINE                           |                        |
| CHOLINE              |                        | CHOLINE                           |                        |
|                      | CITRAMALATE            |                                   | CITRAMALATE            |
| CREATININE           |                        | CREATININE                        |                        |
|                      | CYCLIC AMP             | CYCLIC AMP                        | CYCLIC AMP             |
| DEOXYCARNITINE       |                        |                                   |                        |
|                      |                        | DIHYDROBIOPTERIN                  |                        |
| DIHYDROURACIL        |                        | DIHYDROURACIL                     |                        |
|                      |                        |                                   | ETHYLMALONATE          |
|                      | GLUCONOLACTONE         |                                   | GLUCONOLACTONE         |
|                      | GLUCURONATE            |                                   | GLUCURONATE            |

|                     |                       |                            |                       |
|---------------------|-----------------------|----------------------------|-----------------------|
| GLUTAMINE           |                       |                            |                       |
|                     | GLUTARATE             |                            |                       |
| GLUTARYLCARNITINE   |                       | GLUTARYLCARNITINE          |                       |
|                     |                       | GLYCOCHENODEOXY<br>CHOLATE |                       |
| GLYCHOLATE          |                       | GLYCHOLATE                 |                       |
|                     |                       | GUANIDINOSUCCINATE         |                       |
|                     |                       |                            | GULOSE                |
| HEXANOATE           | HEXANOATE             |                            | HEXANOATE             |
| HIPPURATE           | HIPPURATE             | HIPPURATE                  | HIPPURATE             |
| HISTIDINE           |                       | HISTIDINE                  | HISTIDINE             |
| HYPOXANTHINE        | HYPOXANTHINE          | HYPOXANTHINE               | HYPOXANTHINE          |
|                     | INOSINE               |                            | INOSINE               |
|                     | ISOCITRATE            |                            | ISOCITRATE            |
|                     |                       | ISOLEUCINE                 |                       |
| KYNURENATE          | KYNURENATE            | KYNURENATE                 | KYNURENATE            |
| KYNURENINE          |                       |                            |                       |
| L-CARNITINE         |                       | L-CARNITINE                |                       |
| LACTOSE             | LACTOSE               |                            |                       |
|                     |                       | LAUROYL CARNITINE          |                       |
| LEUCINE (+)         |                       |                            |                       |
|                     |                       | LYSINE                     |                       |
|                     |                       | MALATE                     |                       |
| METHIONINE          |                       | METHIONINE                 |                       |
|                     | METHYLGLUTARATE       |                            | METHYLGLUTARATE       |
| METHYLTHIOADENOSINE |                       |                            |                       |
|                     |                       |                            | N-ACETYLLALANINE      |
|                     |                       | N-ACETYL ASPARAGINE        |                       |
|                     | N-ACETYL<br>ASPARTATE |                            | N-ACETYL<br>ASPARTATE |
|                     | N-ACETYLCYSTEINE      |                            |                       |



|                       |                            |                            |                            |
|-----------------------|----------------------------|----------------------------|----------------------------|
|                       | N-ACETYL<br>GALACTOSAMINE  |                            |                            |
|                       | N-ACETYL-GLUTAMATE         | N-ACETYLGLUTAMATE          | N-ACETYL-GLUTAMATE         |
| N-ACETYL NEURAMINATE  | N-ACETYL<br>NEURAMINATE    |                            | N-ACETYL<br>NEURAMINATE    |
|                       |                            |                            | N-ACETYL<br>PHENYLALANINE  |
|                       |                            |                            | N-ACETYLSERINE             |
| N-ACETYLTRYPHOPHAN    |                            | N-ACETYLTRYPHOPHAN         | N-ACETYL<br>TRYPHOPHAN     |
| N-ALPHA-ACETYLLYSINE  |                            | N-ALPHA-ACETYLLYSINE       |                            |
| N,N-DIMETHYLARGININE  |                            | N,N-DIMETHYLARGININE       |                            |
| N,N,N-TRIMETHYLLYSINE |                            | N,N,N-TRIMETHYLLYSINE      |                            |
| NICOTINATE            |                            | NICOTINATE                 | NICOTINATE                 |
|                       | NICOTINAMIDE               |                            |                            |
| O-ACETYLCARNITINE     |                            | O-ACETYLCARNITINE          |                            |
|                       |                            |                            | OROTATE                    |
|                       | P-HYDROXY<br>PHENYLACETATE |                            | P-HYDROXY<br>PHENYLACETATE |
| PANTOTHENATE          |                            | PANTOTHENATE               | PANTOTHENATE               |
| PHENYLALANINE         |                            | PHENYLALANINE              |                            |
| PYROGLUTAMATE         |                            | PYROGLUTAMATE              |                            |
| QUINOLINATE           | QUINOLINATE                | QUINOLINATE                | QUINOLINATE                |
| RIBOFLAVIN            | RIBOFLAVIN                 | RIBOFLAVIN                 |                            |
|                       |                            | S-ADENOSYL<br>HOMOCYSTEINE |                            |
| S-ADENOSYLMETHIONINE  |                            |                            |                            |
|                       | SACCHARATE                 |                            |                            |
|                       | TARTRATE                   |                            |                            |
|                       |                            | THEOBROMINE                |                            |
|                       | TRANS-ACONITATE            |                            | TRANS-ACONITATE            |
|                       | TREHALOSE                  |                            | TREHALOSE                  |

|              |              |              |              |
|--------------|--------------|--------------|--------------|
|              |              | TRIGONELLINE |              |
| TRYPTOPHAN   | TRYPTOPHAN   | TRYPTOPHAN   | TRYPTOPHAN   |
| TYROSINE     | TYROSINE     | TYROSINE     | TYROSINE     |
| URATE        | URATE        | URATE        | URATE        |
| UROCANATE    |              | UROCANATE    |              |
| VALINE       |              | VALINE       |              |
| XANTHINE     | XANTHINE     | XANTHINE     | XANTHINE     |
| XANTHOSINE   | XANTHOSINE   | XANTHOSINE   | XANTHOSINE   |
| XANTHURENATE | XANTHURENATE | XANTHURENATE | XANTHURENATE |

**Supplement 4:**

**Supplemental Table S2. Differences in metabolites related to NAD<sup>+</sup> synthesis between groups of hospitalized COVID-19 patients with and without AKI.** Values are peak area under curve (AUC) of metabolites by liquid chromatography - tandem mass spectrometry LC-MSMS divided by peak AUC of urinary creatinine for each respective patient. Metabolites are cationic forms only where both anion and cation forms are identifiable by LC-MSMS, and are presented as either mean ( $\bar{x}$ ) or median (M) depending on whether their distribution is Gaussian or not. P-values are calculated using Student's t-test for variables with Gaussian distribution, and are otherwise calculated using the Mann-Whitney test. Quin, quinolate; NaMN, nicotinic acid mononucleotide; NAD<sup>+</sup>, nicotinamide adenine dinucleotide; MNA, 1-methyl nicotinamide; NAM, nicotinamide; NMN, nicotinamide mononucleotide.

| Metabolite                          | Boston |        |       | Alabama |        |       | Pooled |        |       |
|-------------------------------------|--------|--------|-------|---------|--------|-------|--------|--------|-------|
|                                     | AKI    | No AKI | p     | AKI     | No AKI | p     | AKI    | No AKI | p     |
| Tryptophan ( $\bar{x}$ )            | 0.016  | 0.046  | 0.09  | 0.023   | 0.076  | 0.005 | 0.019  | 0.057  | 0.002 |
| Kynurenine (M)                      | 0.006  | 0.022  | 0.03  | 0.008   | 0.008  | 0.99  | 0.006  | 0.015  | 0.07  |
| Kynurenate ( $\bar{x}$ )            | 0.082  | 0.025  | 0.004 | 0.070   | 0.049  | 0.11  | 0.078  | 0.035  | 0.001 |
| 3-Hydroxyanthranilate (M)           | 0.001  | 0.003  | 0.04  | 0.001   | 0.004  | 0.006 | 0.001  | 0.004  | 0.001 |
| Quinolate ( $\bar{x}$ )             | 0.037  | 0.022  | 0.21  | 0.016   | 0.014  | 0.60  | 0.028  | 0.018  | 0.16  |
| Nicotinate ( $\bar{x}$ )            | 0.033  | 0.019  | 0.20  | 0.017   | 0.009  | 0.03  | 0.027  | 0.015  | 0.08  |
| 1-Methyl nicotinamide ( $\bar{x}$ ) | 0.037  | 0.24   | 0.10  | 0.009   | 0.017  | 0.11  | 0.027  | 0.021  | 0.32  |
| Nicotinamide ( $\bar{x}$ )          |        |        |       | 0.0009  | 0.003  | 0.003 |        |        |       |
| Nicotinamide mononucleotide (M)     | 0.001  | 0.0007 | 0.23  | 0.0004  | 0.0004 | 0.15  | 0.0005 | 0.0005 | 0.75  |

**Supplement 5:**

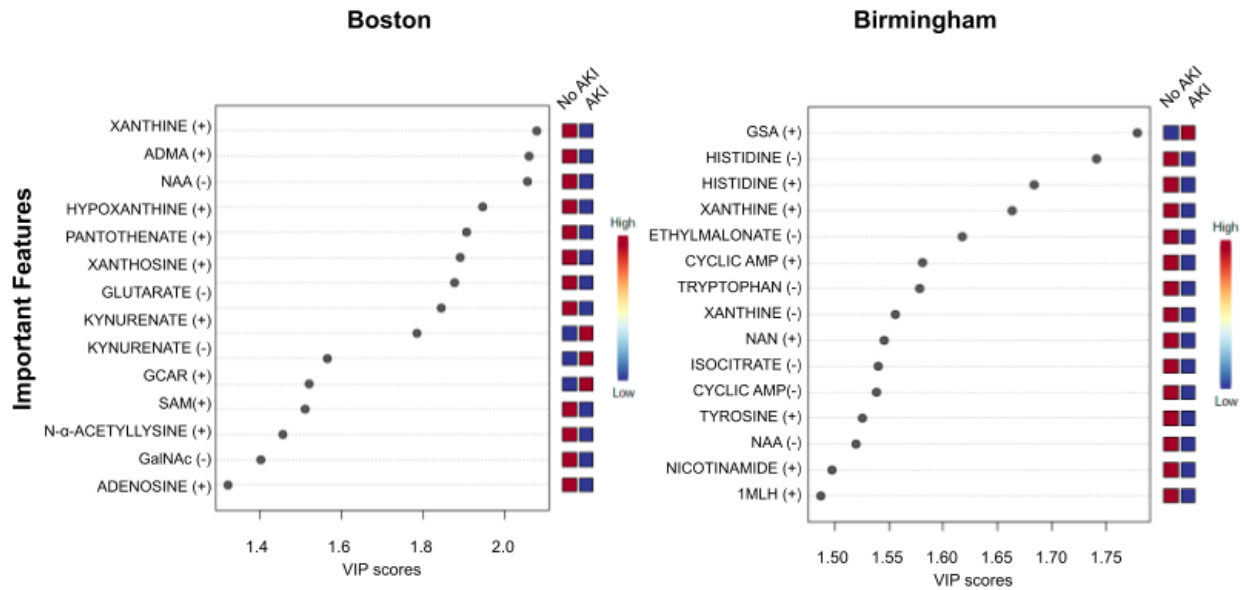

**Supplemental Figure S1. Important features identified by variable importance in projection (VIP) scores in supervised partial least squares analysis.** Urine metabolomic features are compared between patients with COVID-19 with and without AKI in a critically ill population in Boston and a general hospital population in Alabama. ADMA, N,N dimethylarginine; NAA, n-acetylaspartate; GCAR, glutaryl carnitine; SAM, s-adenosylmethionine; GalNAc, n-acetylgalactosamine; GSA, guanidinosuccinate; NAN, n-acetylasparagine; 1MLH, 1-methyl-L-histidine.

**Supplement 6:**

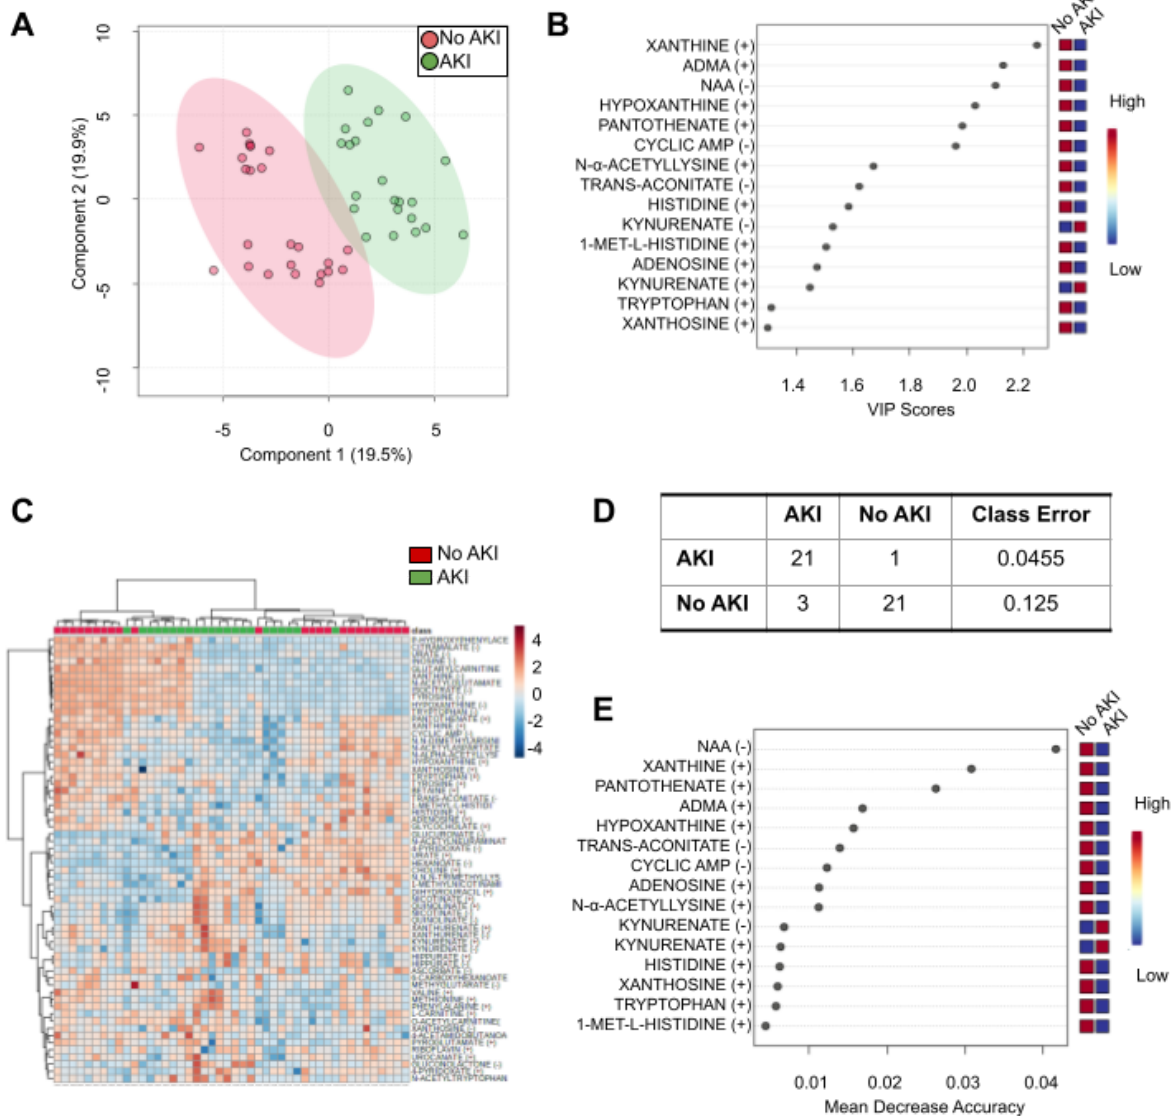

**Supplemental Figure S2. Urine metabolomic features distinguishing acute kidney injury (AKI) among COVID-19 patients pooled across Boston and Birmingham cohorts.** A) Supervised Partial Least Squares-Discriminant Analysis (PLS-DA) plot comparing patients with (green) and without (red) AKI. B) Important features identified by variable importance in projection (VIP) scores in PLS-DA. C) Unsupervised hierarchical clustering analysis comparing urine metabolomic features in patients with (green) and without (red) AKI and relative increases (red) or decreases (blue) in metabolite levels. D) Supervised Random Forest predictions and class error comparing AKI and No AKI groups. E) Key features identified by Random Forest comparing patients with and without AKI; red and blue boxes respectively denote relatively high

or low concentrations of metabolites important in classification. NAA, n-acetylaspartate; ADMA, N,N dimethylarginine.

## Supplement 7: Modified STROBE Statement

|                           | Item No | Recommendation                                                                                                                                                                                                                                                                                                                                                          |
|---------------------------|---------|-------------------------------------------------------------------------------------------------------------------------------------------------------------------------------------------------------------------------------------------------------------------------------------------------------------------------------------------------------------------------|
| <b>Title and abstract</b> | 1       | <p>(a) Indicate the study’s design with a commonly used term in the title or the abstract<br/> “Observed” included in title</p> <hr/> <p>(b) Provide in the abstract an informative and balanced summary of what was done and what was found ✓ pg 2-3</p>                                                                                                               |
| <b>Introduction</b>       |         |                                                                                                                                                                                                                                                                                                                                                                         |
| Background/rationale      | 2       | <p>Explain the scientific background and rationale for the investigation being reported<br/> ✓ pg 4-5</p>                                                                                                                                                                                                                                                               |
| Objectives                | 3       | <p>State specific objectives, including any prespecified hypotheses<br/> ✓ final paragraph of introduction (pg 5)</p>                                                                                                                                                                                                                                                   |
| <b>Methods</b>            |         |                                                                                                                                                                                                                                                                                                                                                                         |
| Study design              | 4       | <p>Present key elements of study design early in the paper<br/> ✓ pg 5</p>                                                                                                                                                                                                                                                                                              |
| Setting                   | 5       | <p>Describe the setting, locations, and relevant dates, including periods of recruitment, exposure, follow-up, and data collection<br/> ✓ pg 5-6</p>                                                                                                                                                                                                                    |
| Participants              | 6       | <p>(a) <i>Cohort study</i>—Give the eligibility criteria, and the sources and methods of selection of participants. Describe methods of follow-up<br/> <i>Case-control study</i>—Give the eligibility criteria, and the sources and methods of case ascertainment and control selection. Give the rationale for the choice of cases and controls<br/> ✓ pg 6, fig 1</p> |

|                              |    |                                                                                                                                                                                                                                                        |
|------------------------------|----|--------------------------------------------------------------------------------------------------------------------------------------------------------------------------------------------------------------------------------------------------------|
|                              |    | <i>Cross-sectional study</i> —Give the eligibility criteria, and the sources and methods of selection of participants                                                                                                                                  |
| Variables                    | 7  | Clearly define all outcomes, exposures, predictors, potential confounders, and effect modifiers. Give diagnostic criteria, if applicable<br>✓ pg 6-7                                                                                                   |
| Data sources/<br>measurement | 8* | For each variable of interest, give sources of data and details of methods of assessment (measurement).<br>✓ pg 6-7, supplemental methods                                                                                                              |
| Bias                         | 9  | Describe any efforts to address potential sources of bias<br>✓ pg 7                                                                                                                                                                                    |
| Study size                   | 10 | Explain how the study size was arrived at (if applicable)<br>✓ pg 6                                                                                                                                                                                    |
| Quantitative variables       | 11 | Explain how quantitative variables were handled in the analyses. If applicable, describe which groupings were chosen and why<br>✓ pg 7-8                                                                                                               |
| Statistical methods          | 12 | (a) Describe all statistical methods, including those used to control for confounding<br>✓ pg 7-8<br><hr/> (b) Describe any methods used to examine subgroups and interactions<br>✓ pg 7-8<br><hr/> (c) Explain how missing data were addressed<br>N/a |



|                  |     |                                                                                                                                                                                                                                                                                                                                                                                |
|------------------|-----|--------------------------------------------------------------------------------------------------------------------------------------------------------------------------------------------------------------------------------------------------------------------------------------------------------------------------------------------------------------------------------|
|                  |     | <p>(d) <i>Cohort study</i>—If applicable, explain how loss to follow-up was addressed</p> <p><i>Case-control study</i>—If applicable, explain how matching of cases and controls was addressed</p> <p>✓ Participants section of methods</p> <p><i>Cross-sectional study</i>—If applicable, describe analytical methods taking account of sampling strategy</p> <p>✓ pg 7-8</p> |
|                  |     | <p>(e) Describe any sensitivity analyses</p> <p>✓ supplement 6</p>                                                                                                                                                                                                                                                                                                             |
| <b>Results</b>   |     |                                                                                                                                                                                                                                                                                                                                                                                |
| Participants     | 13* | <p>(a) Report numbers of individuals at each stage of study—eg numbers potentially eligible, examined for eligibility, confirmed eligible, included in the study, completing follow-up, and analyzed</p> <p>✓ Figure 1</p>                                                                                                                                                     |
|                  |     | <p>(c) Use of a flow diagram</p> <p>✓ Figure 1</p>                                                                                                                                                                                                                                                                                                                             |
| Descriptive data | 14* | <p>(a) Give characteristics of study participants (eg demographic, clinical, social) and information on exposures and potential confounders</p> <p>✓ Table 1</p>                                                                                                                                                                                                               |
|                  |     | <p>(b) Indicate number of participants with missing data for each variable of interest</p> <p>✓ Only area of missing data was with baseline creatinine – methodology used to determine this is described on page 6</p>                                                                                                                                                         |
|                  |     | <p>(c) <i>Cohort study</i>—Summarise follow-up time (eg, average and total amount)</p>                                                                                                                                                                                                                                                                                         |
| Outcome data     | 15* | <p><i>Cohort study</i>—Report numbers of outcome events or summary measures over time</p>                                                                                                                                                                                                                                                                                      |

|                   |    |                                                                                                                                                                                                                                     |
|-------------------|----|-------------------------------------------------------------------------------------------------------------------------------------------------------------------------------------------------------------------------------------|
|                   |    | <p><i>Case-control study</i>—Report numbers in each exposure category, or summary measures of exposure</p> <p>✓ Figure 1</p>                                                                                                        |
|                   |    | <p><i>Cross-sectional study</i>—Report numbers of outcome events or summary measures</p>                                                                                                                                            |
| Main results      | 16 | <p>(a) Give unadjusted estimates and, if applicable, confounder-adjusted estimates and their precision (eg, 95% confidence interval). Make clear which confounders were adjusted for and why they were included</p> <p>✓ pg 8-9</p> |
| Other analyses    | 17 | <p>Report other analyses done—eg analyses of subgroups and interactions, and sensitivity analyses</p> <p>✓ pg 9</p>                                                                                                                 |
| <b>Discussion</b> |    |                                                                                                                                                                                                                                     |
| Key results       | 18 | <p>Summarise key results with reference to study objectives</p> <p>✓ pg 9-10</p>                                                                                                                                                    |
| Limitations       | 19 | <p>Discuss limitations of the study, taking into account sources of potential bias or imprecision. Discuss both direction and magnitude of any potential bias</p> <p>✓ pg 12</p>                                                    |
| Interpretation    | 20 | <p>Give a cautious overall interpretation of results considering objectives, limitations, multiplicity of analyses, results from similar studies, and other relevant evidence</p> <p>✓ pg 10-13</p>                                 |
| Generalisability  | 21 | <p>Discuss the generalisability (external validity) of the study results</p> <p>✓ pg 12-13</p>                                                                                                                                      |

\*Give information separately for cases and controls in case-control studies and, if applicable, for exposed and unexposed groups in cohort and cross-sectional studies.
